# Supplementary material for: A Marginalised Role in Parenting and Maltreatment Risks—A Qualitative Content Analysis of Fathers in Japan Reflecting on their Parenting Experiences
Source: Springer Nature journal article supplement (doi:10.1007/s10826-023-02707-9), 2024-01-20
Supplement: MOESM1 [file 26647586]

Appendix 1: Interview guides (translated from Japanese)

The aim of the interview is at exploring mental states during parenting in fathers of young children specifically on parental anxieties and concerns for maltreat through their narratives.

Items:

Note: ‘me’ in the items below refer to the interviewing researcher, [ANONYMISED]

- - - 1. Please tell me about your family, starting with your child such as their age, and introduce your spouse the child’s mother, and whether you both work and if your child attends a day-care centre/nursery.
      2. Please talk through instances in your parenthood so far when you felt anxious, including as much details of the context and relevant factors as you can. Please include details of any relevant context relating to your child and your family at the time.
      3. Please tell me about any instance as a parent that you felt anxious about maltreatment of your child, with details on what happened, any relevant context and what were your thoughts and feelings at the time. Please include details of any relevant context relating to your child and your family at the time.
      4. Please tell me about your stance on しつけ*shi-tsu-ke*, ‘discipline’and how you think it is reflected in your everyday parenthood. Please include everyday experiences and examples.
